# Supplementary material for: Simulation and Experimental Analysis of Microalgae and Membrane Surface Interaction
Source: MDPI journal article supplement (doi:10.3390/colloids7010024), 2023-03-20
Supplement: s1 [file s1]

Supplementary Materials

# Simulation and Experimental Analysis of Microalgae and Membrane Surface Interaction

Negar Khosravi, Duowei Lu, Yichen Liao, Baoqiang Liao and Pedram Fatehi \*

Green Processes Research Centre and Chemical Engineering Department, Lakehead University, 955 Oliver Road, Thunder Bay, ON P7B5E1, Canada

\* Correspondence: pfatehi@lakeheadu.ca; Tel.: +1-807-343-8697; Fax: +1-807-346-7943

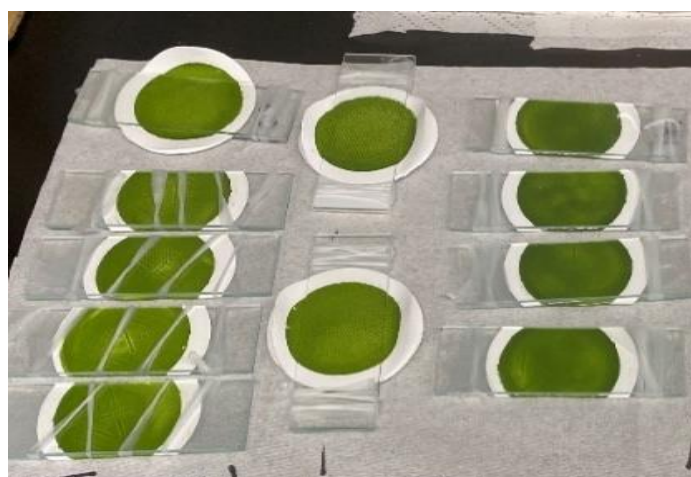

**Figure S1.** surface of filter paper covered with algae.

## 1. Measurement of Liquid Surface Tension

Diiodomethane, formamide and water were selected as the probe liquids and the surface tensions were shown in Table S1.

**Table S1.** Surface tensions (mN/m) of three probe liquids. [1].

| Probe liquids | $\gamma_l^{LW}$ | $\gamma_l^-$ | $\gamma_l^+$ |
|---------------|-----------------|--------------|--------------|
| Water         | 21.8            | 25.5         | 25.5         |
| Formamide     | 39.0            | 39.6         | 2.28         |
| Diiodomethane | 50.8            | 0.0          | 0.0          |

## 2. Adsorption Analysis

Before measurement, the sensors of the QCM-D instruments were cleaned by treating them in a UV/ozone oxidation cleaner (PSD Series, digital UV ozone system) for 15 min, followed by immersion in the 2 wt.% SDS solution for 2 h. Subsequently, the sensors were rinsed thoroughly with Milli-Q water and applied nitrogen gas to dry them. QCM-D adsorption experiments were conducted on the sensors by firstly introducing Milli-Q water buffer for 5 min to establish a stable baseline. Then, microalgae solution was introduced to the flow chamber, and frequency and dissipation changes were monitored. The fundamental frequency of the crystal sensor at the 5<sup>th</sup> overtone was monitored. After that, the sensors were rinsed with Milli-Q water for 3.5 minutes to monitor desorption. The pump rate of 0.15 mL/min and temperature of 20 °C were set throughout all QCM-D

experiments. The generated data was fitted into the Sauerbrey equation. The density and fluid viscosity were assumed to be  $0.99 \text{ g/cm}^3$  and  $1.05 \text{ mPa}\cdot\text{s}$ , respectively.

### 3. Contact Angle of Microalgae

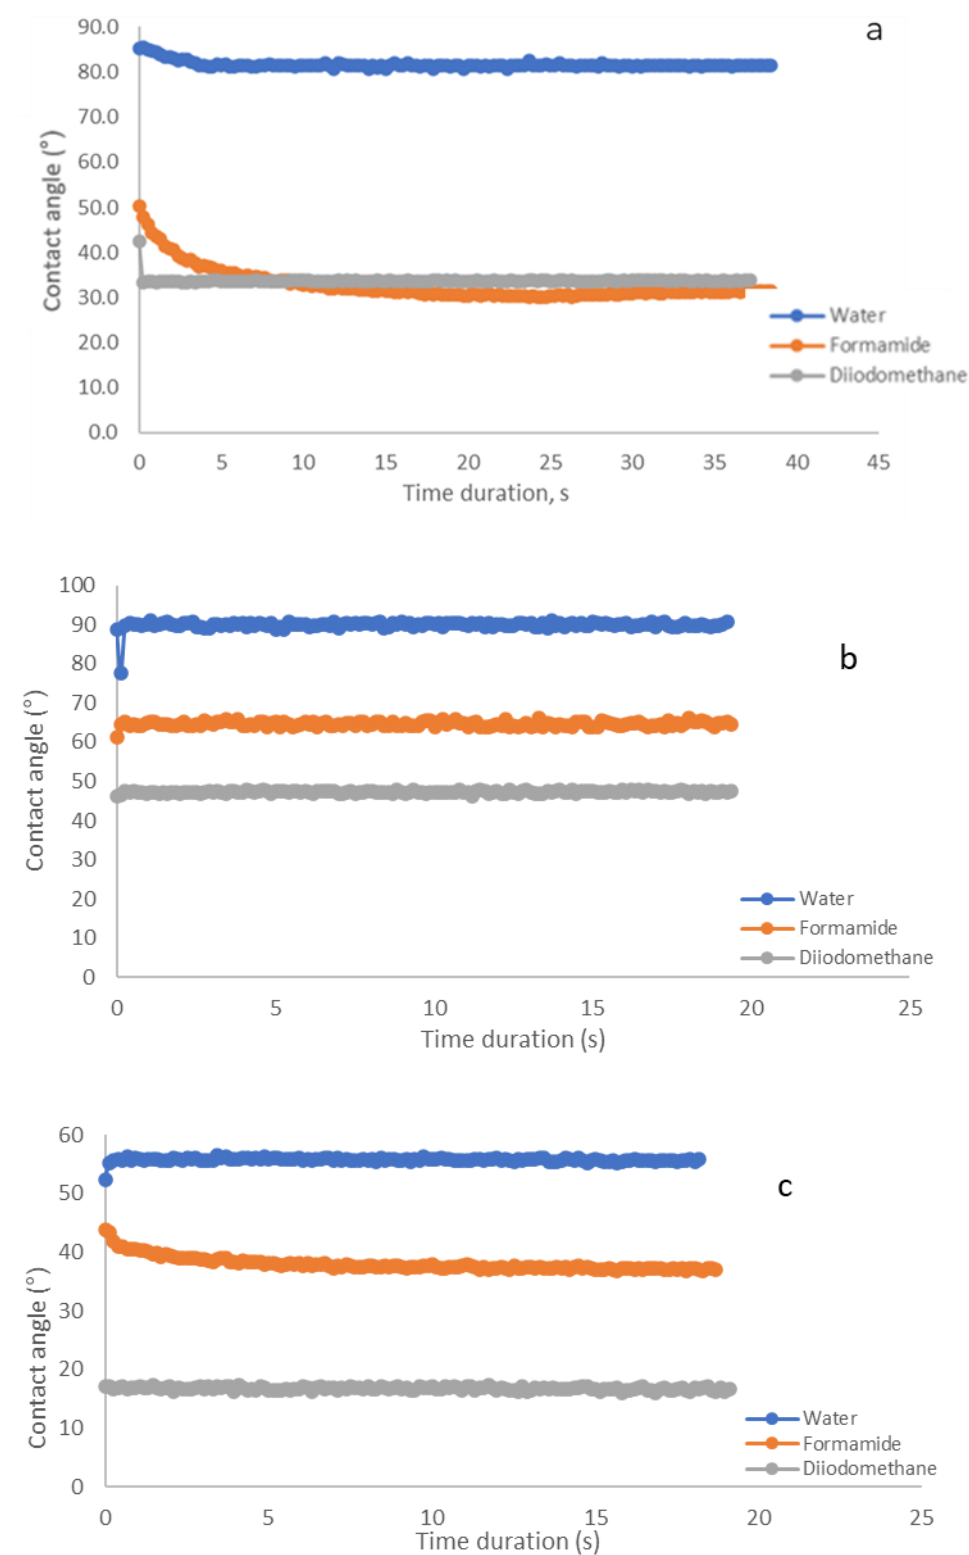

**Figure S2.** Contact angle of diiodomethane, formamide and water (a) on the surface of microalgae; (b) PDMS, (c) PU sensor.

## Reference

1. Yu, G.; Cai, X.; Shen, L.; Chen, J.; Hong, H.; Lin, H.; Li, R. A novel integrated method for quantification of interfacial interactions between two rough bioparticles. *J. Colloid Interface Sci.* **2018**, *516*, 295–303. <https://doi.org/10.1016/j.jcis.2018.01.075>.
